# Supplementary figures and images for: High-performance mid-infrared linear polarizers using Fabry–Pérot-resonant HSQ-based gratings via a simplified fabrication
Source: Royal Society of Chemistry journal article supplement (doi:10.1039/d5nr03154k), 2025-10-30

(a)

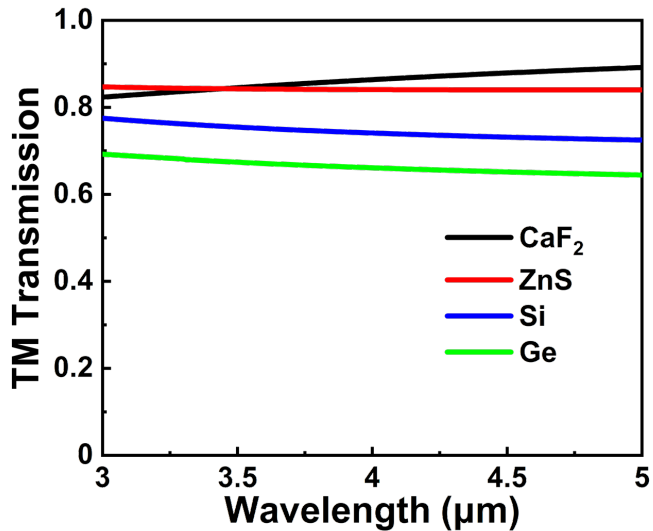

(b)

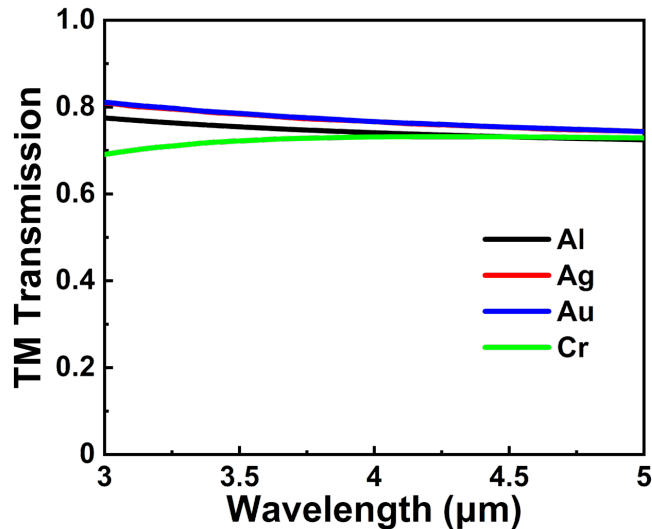

Supplement: d5nr03154k2.pdf [file d5nr03154k2.pdf]

(a)

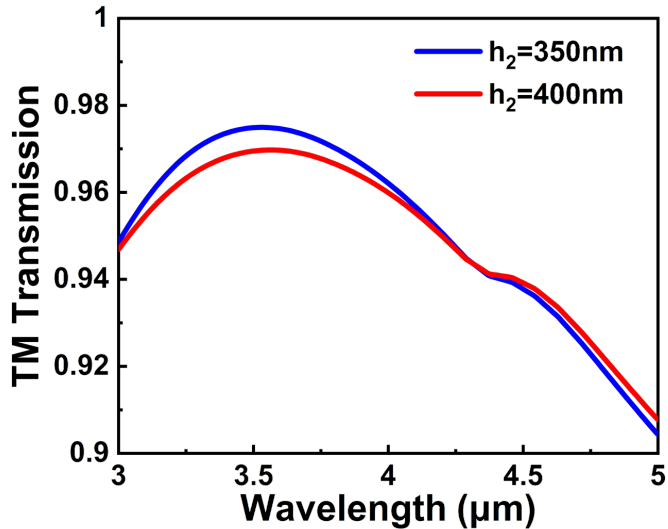

(b)

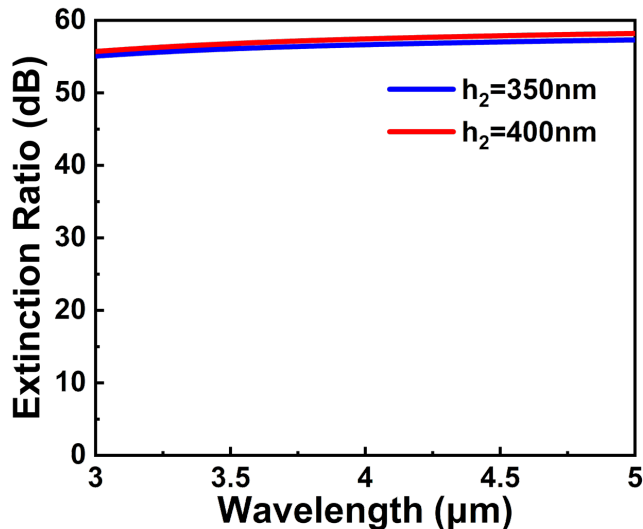

Supplement: d5nr03154k6.pdf [file d5nr03154k6.pdf]
